# Supplementary material for: Droplet-based in situ X-ray absorption spectroscopy cell for studying crystallization processes at the tender X-ray energy range
Source: Royal Society of Chemistry journal article supplement (doi:10.1039/c9ra06084g), 2019-01-01
Supplement: c9ra06084g1.pdf [file c9ra06084g1.pdf]

## Supplementary Information

### **Droplet-based *in situ* X-ray absorption spectroscopy cell for studying crystallization processes at the tender X-ray energy range.**

Jacinta Xto,<sup>\*a, b</sup> Reto Wetter<sup>a</sup>, Camelia N. Borca,<sup>a</sup> Christophe Friehe<sup>a</sup>, Jeroen A. van Bokhoven<sup>a,b</sup> and Thomas Huthwelker<sup>\*a</sup>

<sup>a</sup>Paul Scherrer Institut, 5232 Villigen, Switzerland

<sup>b</sup>Institute for Chemical and Bioengineering, ETH Zürich, 8093 Zürich, Switzerland

#### **XRD measurements**

For the XRD measurements, dried powder samples were crushed to make a fine powder, loaded on a PMMA sample holder and gently pressed to make a compact and smooth surface.

The measurements were done using a Bruker D8 Advance instrument with Cu radiation source (wavelength:  $\alpha_1 = 1.54056$ ,  $\alpha_2 = 1.54439$  angstrom, intensity ratio  $\alpha_1/\alpha_2 = 2:1$ ) and a Lynxeye XE, 2.943° opening detector was used. The incident beam optics were : 0.3° divergent slit, 2.5° soller slit and diffracted beam optics: 2.5° soller slit, 4° antiscatter slit and Ni filter.

The diffraction pattern was recorded between 10° to 70° with a step size of 0.03°, 57.60s per step. Phase identification was done using Diffrac.eva search/match database from Bruker. Fig S1a shows the XRD patterns for the calcium carbonate reference patterns and Fig S1b shows the corresponding calcium XANES spectra with the pre-edge region zoomed in.

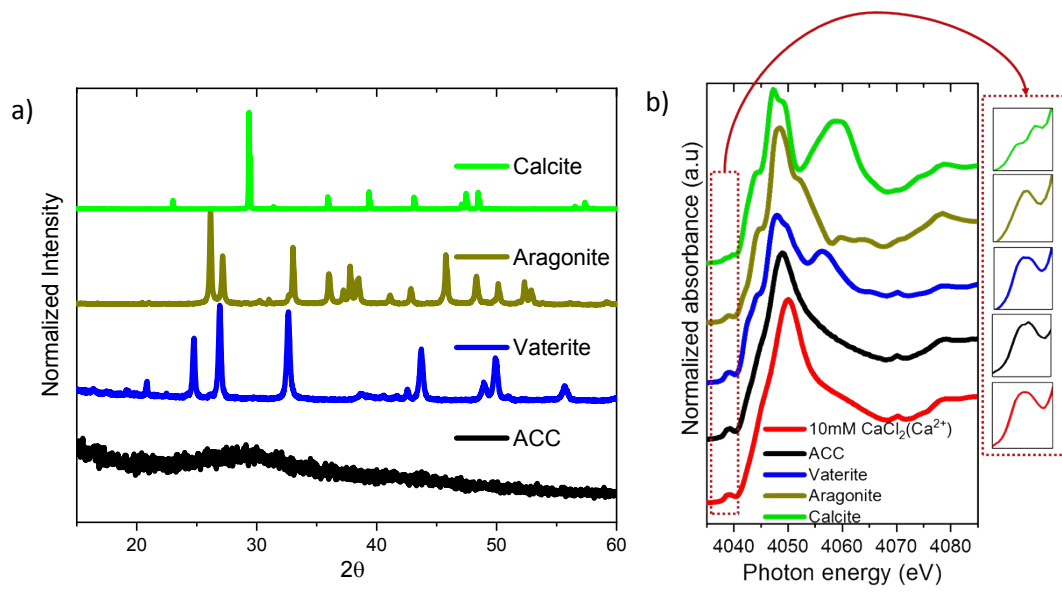

**Fig S1:** a) XRD patterns and b) calcium K-edge XANES spectra of ACC, vaterite, calcite and aragonite.
